# Supplementary material for: Carbon Dioxide Adsorption over Activated Carbons Produced from Molasses Using H2SO4, H3PO4, HCl, NaOH, and KOH as Activating Agents
Source: MDPI journal article supplement (doi:10.3390/molecules27217467), 2022-11-02
Supplement: s1 [file s1]

## Supplementary

# Carbon Dioxide Adsorption over Activated Carbons Produced from Molasses Using H<sub>2</sub>SO<sub>4</sub>, H<sub>3</sub>PO<sub>4</sub>, HCl, NaOH, and KOH as Activating Agents

Karolina Kielbasa <sup>1</sup>, Şahin Bayar <sup>2</sup>, Esin Apaydin Varol <sup>2</sup>, Joanna Sreńscek-Nazzal <sup>1</sup>, Monika Bosacka <sup>3</sup>, Piotr Miądlicki <sup>1</sup>, Jarosław Serafin <sup>4,\*</sup>, Rafał J. Wróbel <sup>1,\*</sup> and Beata Michalkiewicz <sup>1</sup>

<sup>1</sup> Faculty of Chemical Technology and Engineering, Department of Catalytic and Sorbent Materials Engineering, West Pomeranian University of Technology in Szczecin, Piastów Ave. 42, 71-065 Szczecin, Poland

<sup>2</sup> Faculty of Engineering, Department of Chemical Engineering, Eskisehir Technical University, Eskisehir 26555, Turkey

<sup>3</sup> Faculty of Chemical Technology and Engineering, Department of Inorganic and Analytical Chemistry, West Pomeranian University of Technology in Szczecin, Piastów Ave. 42, 71-065 Szczecin, Poland

<sup>4</sup> Department of Inorganic and Organic Chemistry, University of Barcelona, Martí i Franquès, 1-11, 08028 Barcelona, Spain

\* Correspondence: jaroslaw.serafin@qi.ub.es (J.S.); rafal.wrobel@zut.edu.pl (R.J.W.)

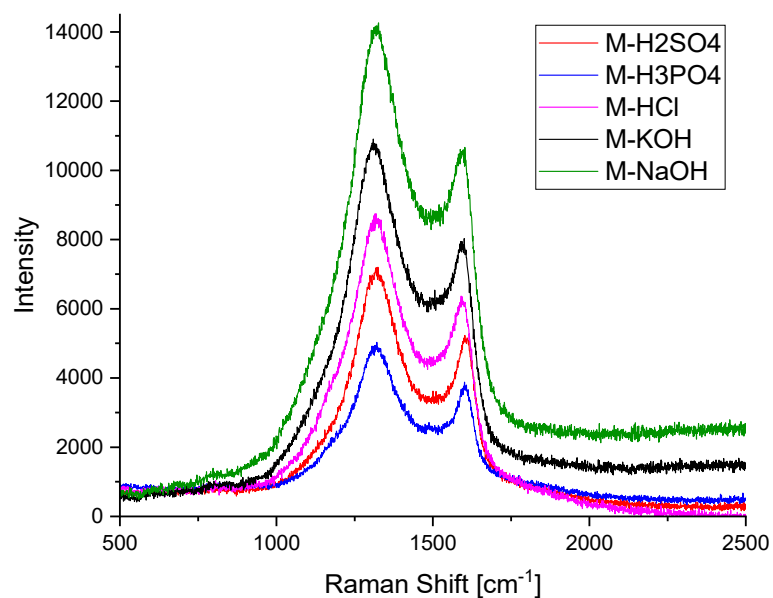

Figure S1. Raman spectra of the activated carbons produced from molasses

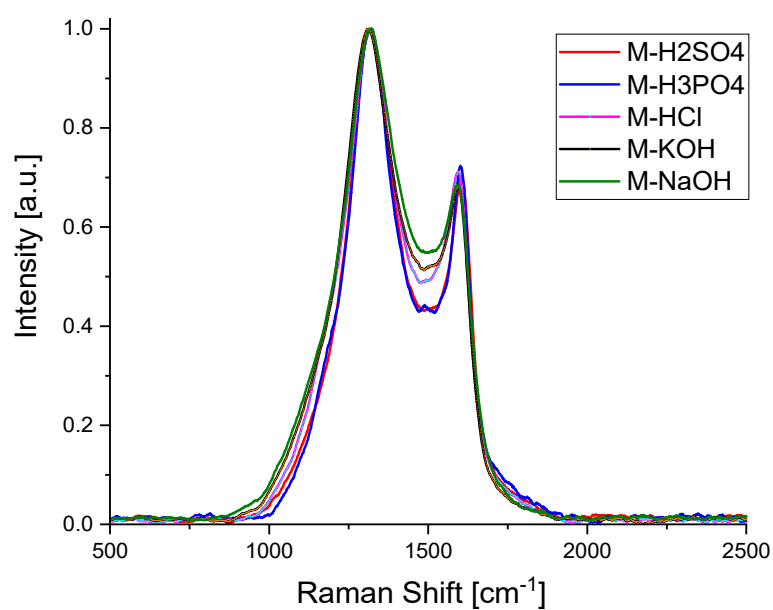

Figure S2. Raman spectra of the activated carbons produced from molasses after the smoothing, baseline subtracting and normalizing to the D band intensity

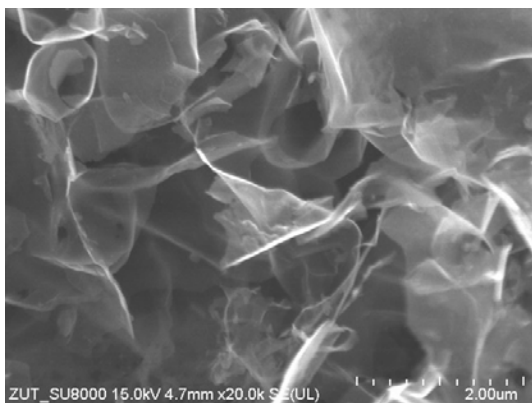

M-NaOH

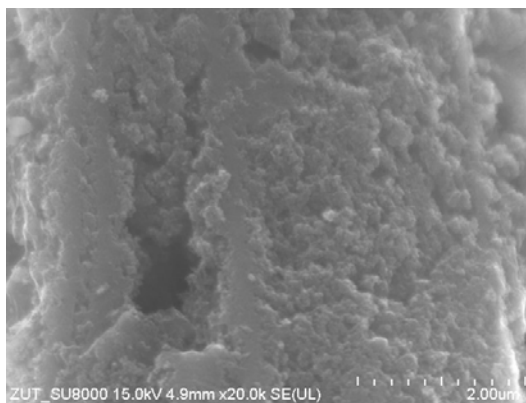

M-H3PO4

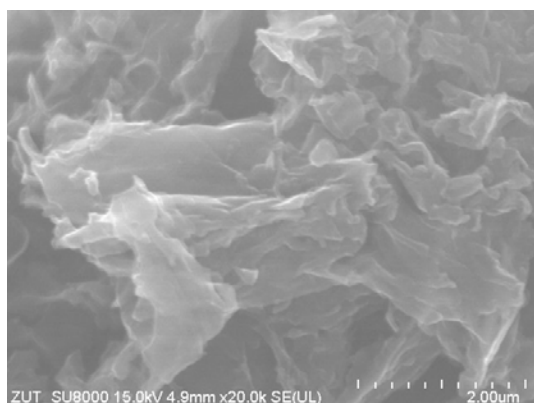

M-HCl

Figure S3. SEM pictures of the activated carbons produced from molasses

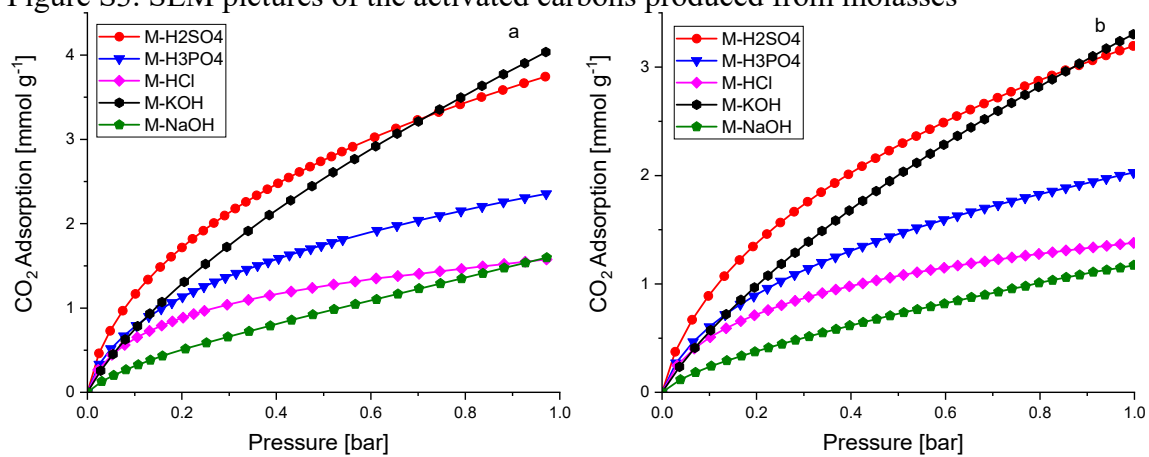

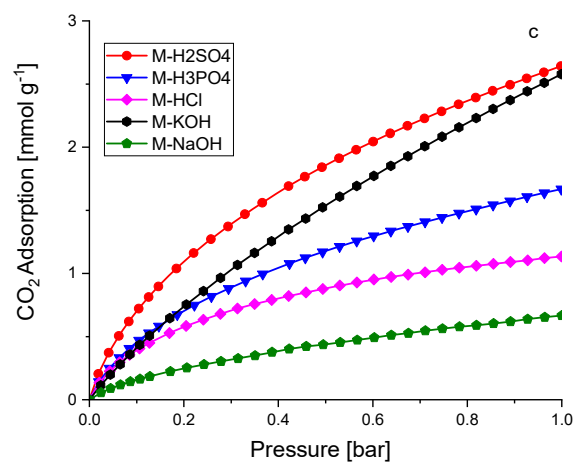

Figure S4. CO<sub>2</sub> adsorption over activated carbons produced from molasses at the temperatures of 10 °C (a), 20 °C (b), 30 °C (c)

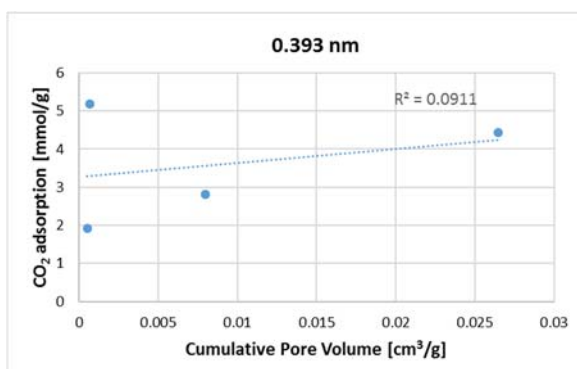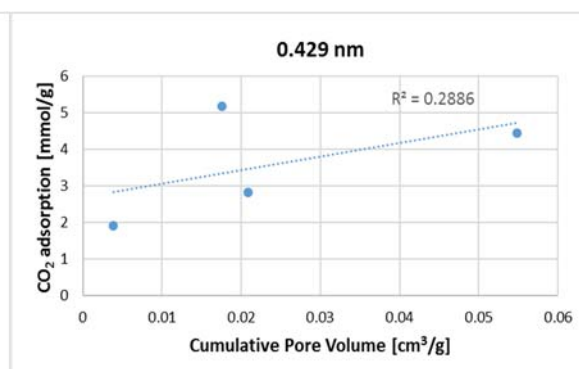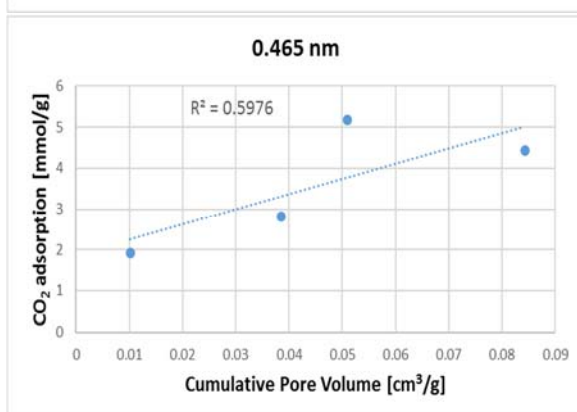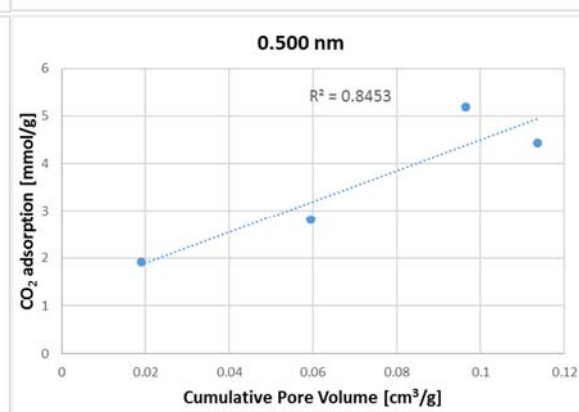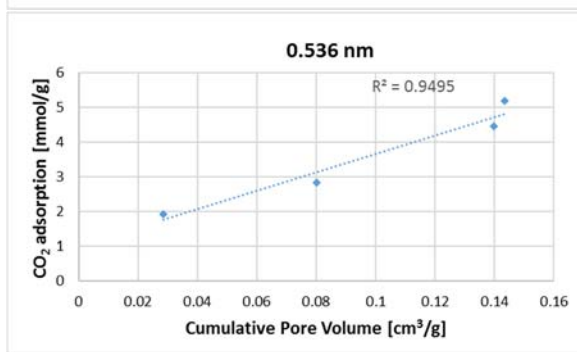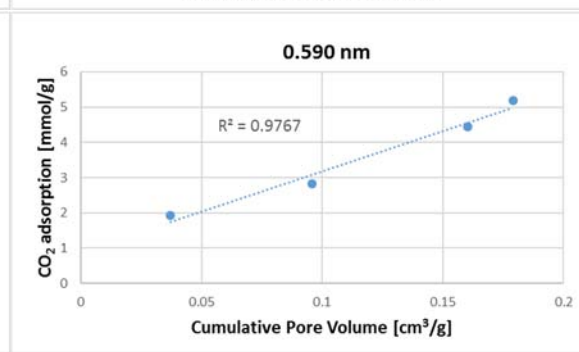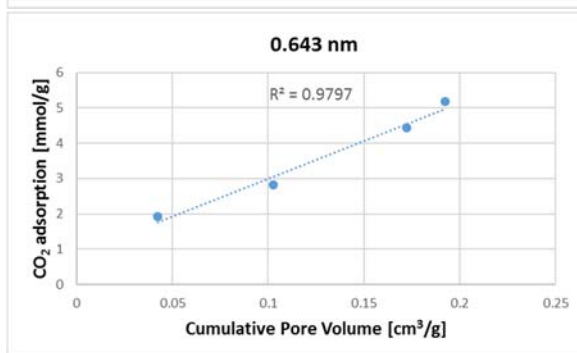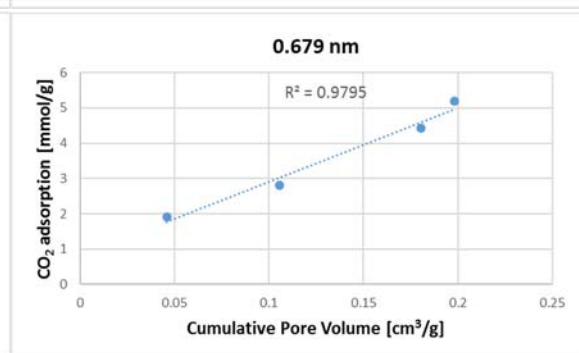

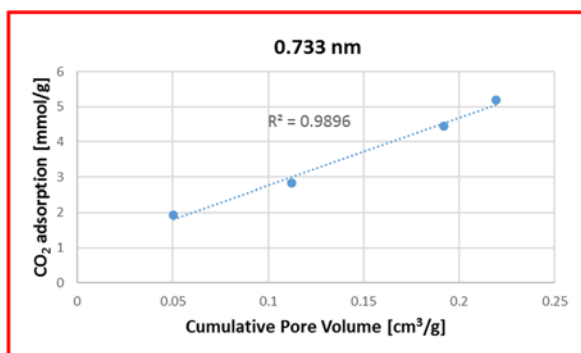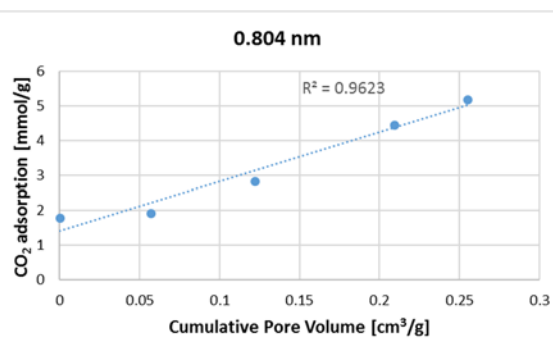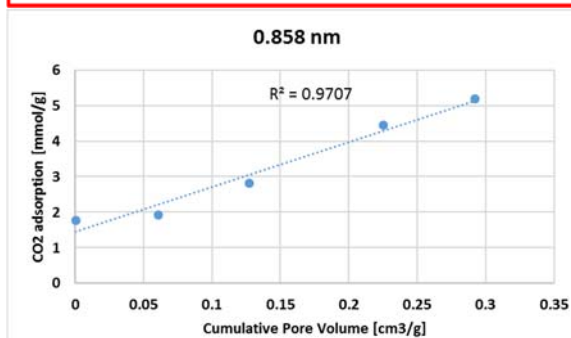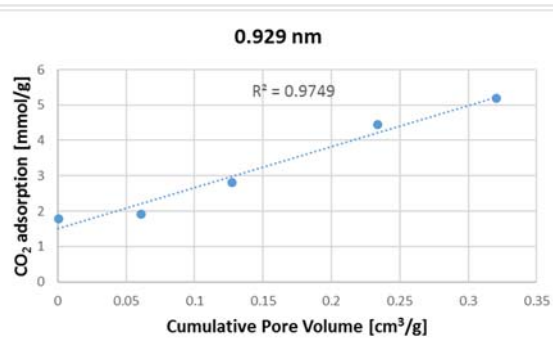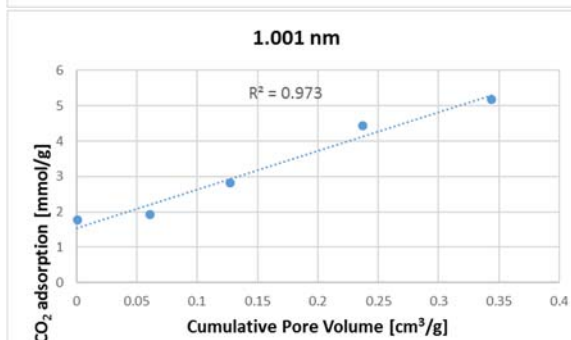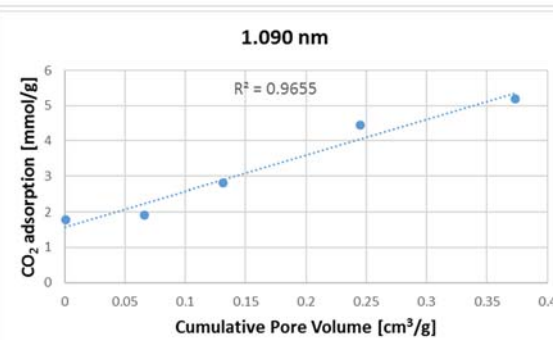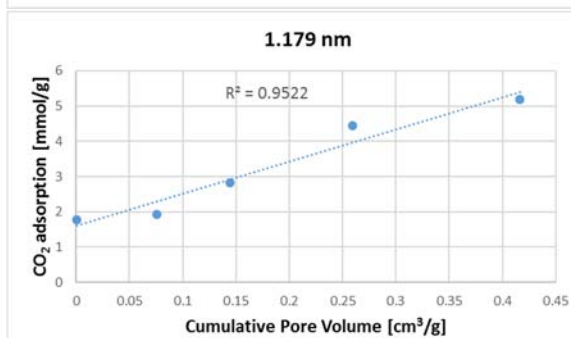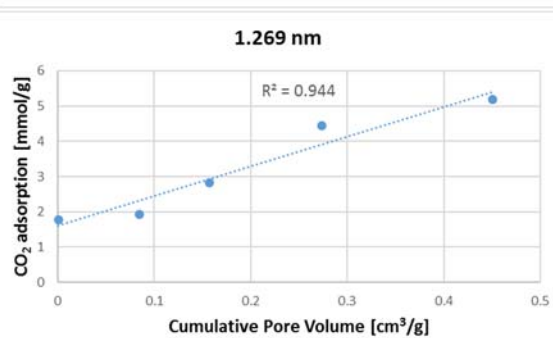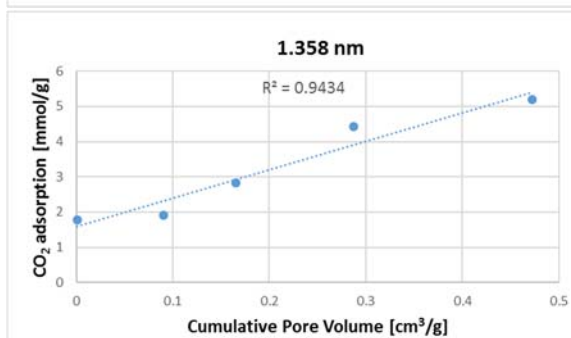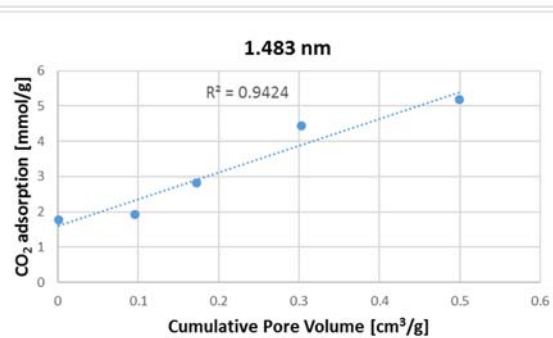

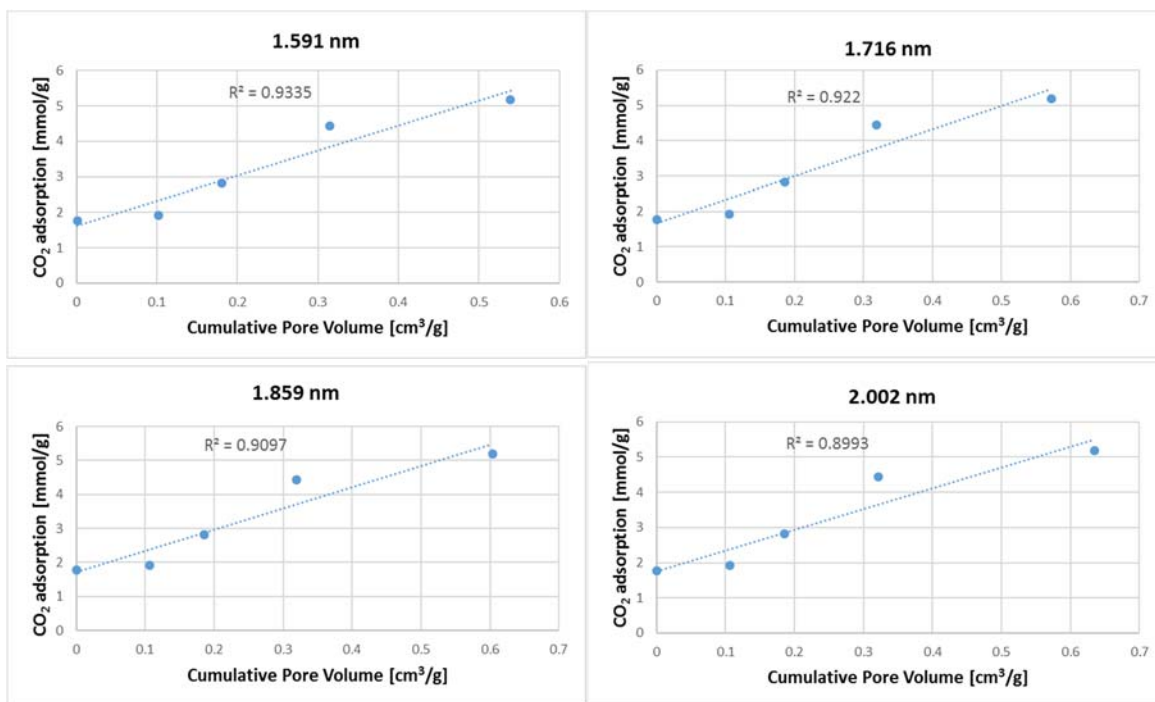

Figure S5. CO<sub>2</sub> adsorption at 1 bar and 0°C as a function of the volume of pores which are equal to and below given diameter. The best fit was outlined in red.

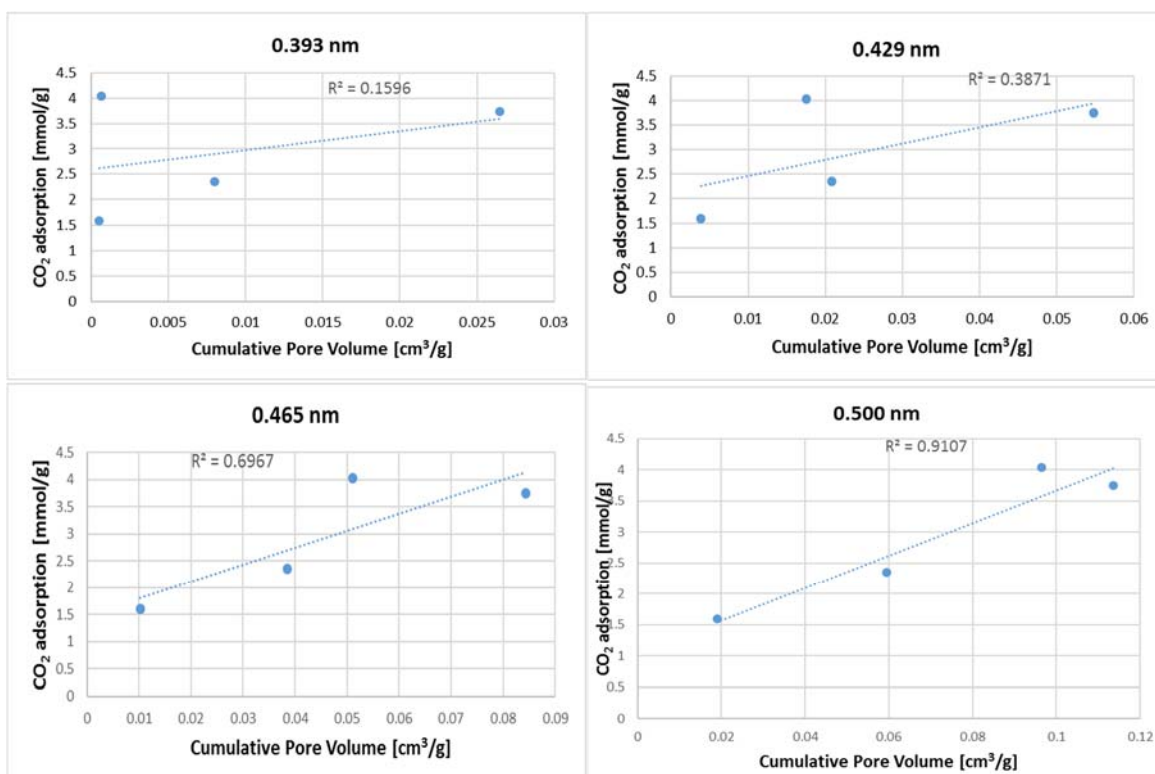

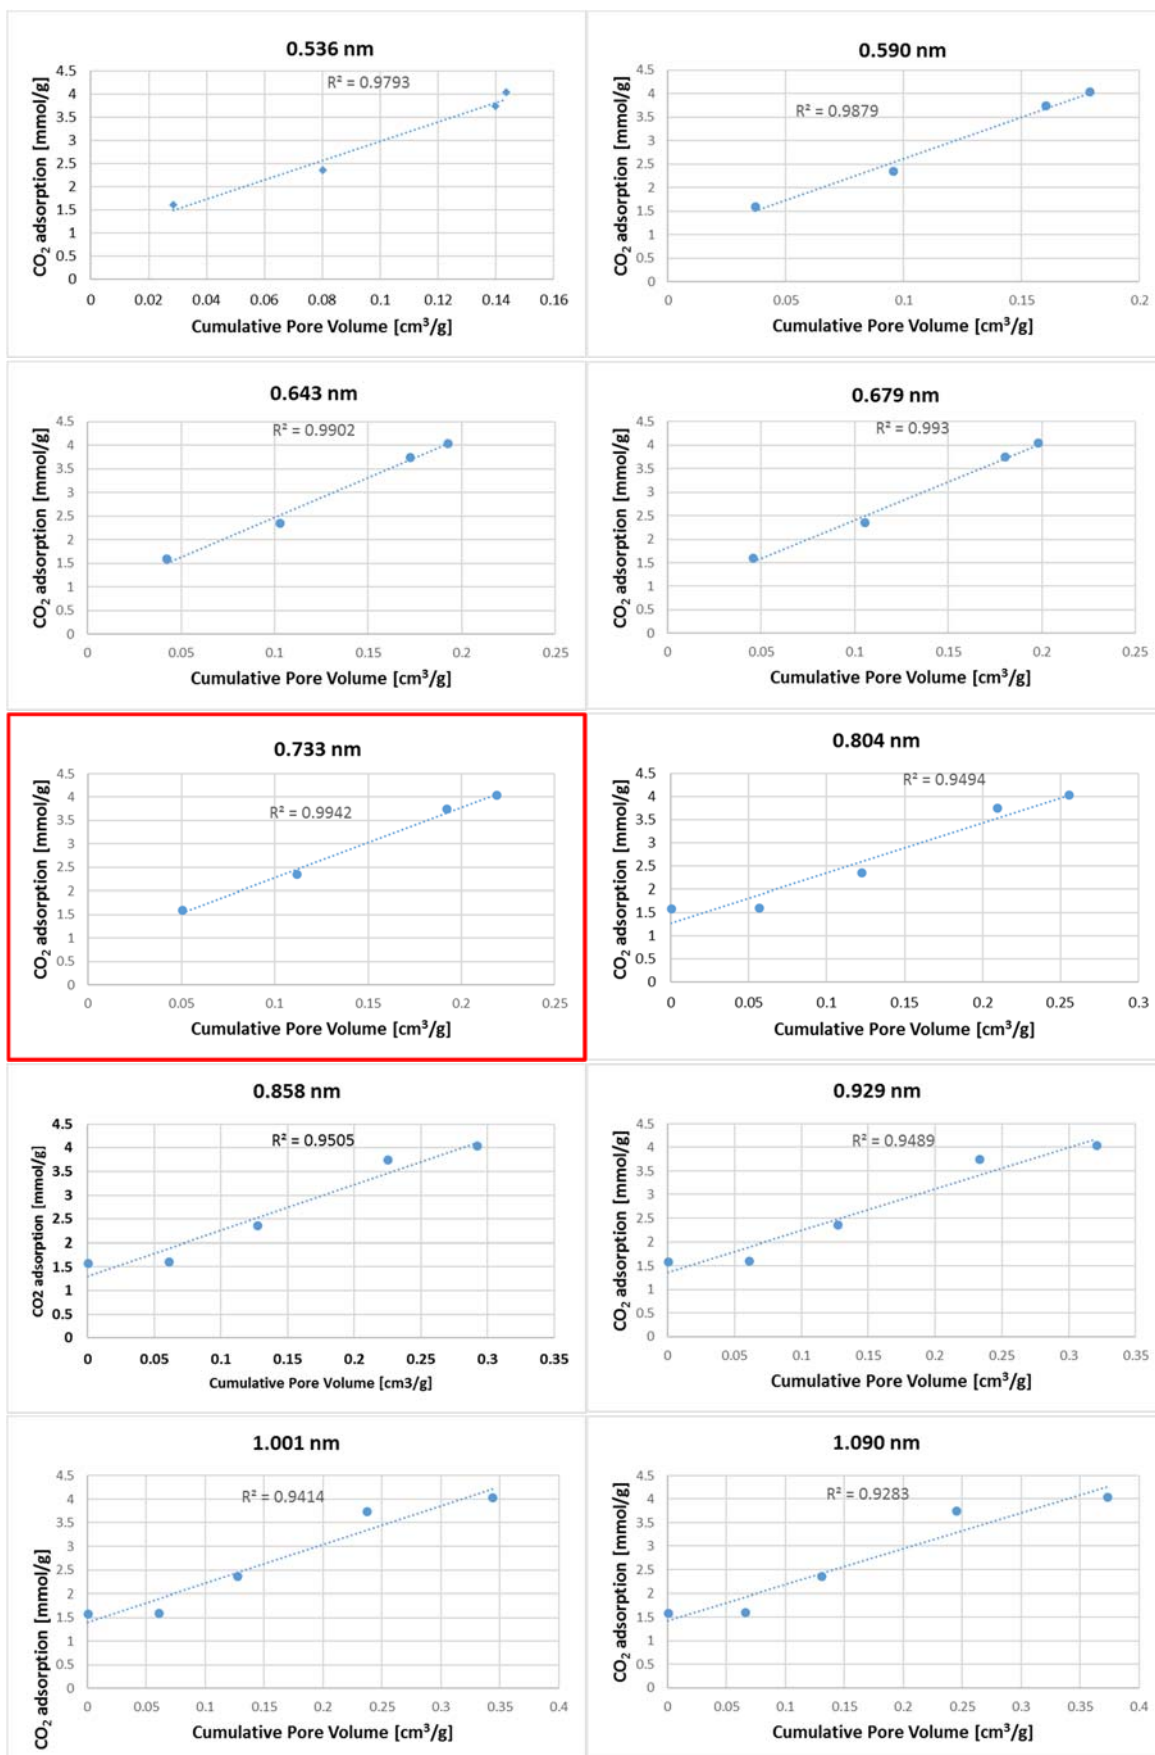

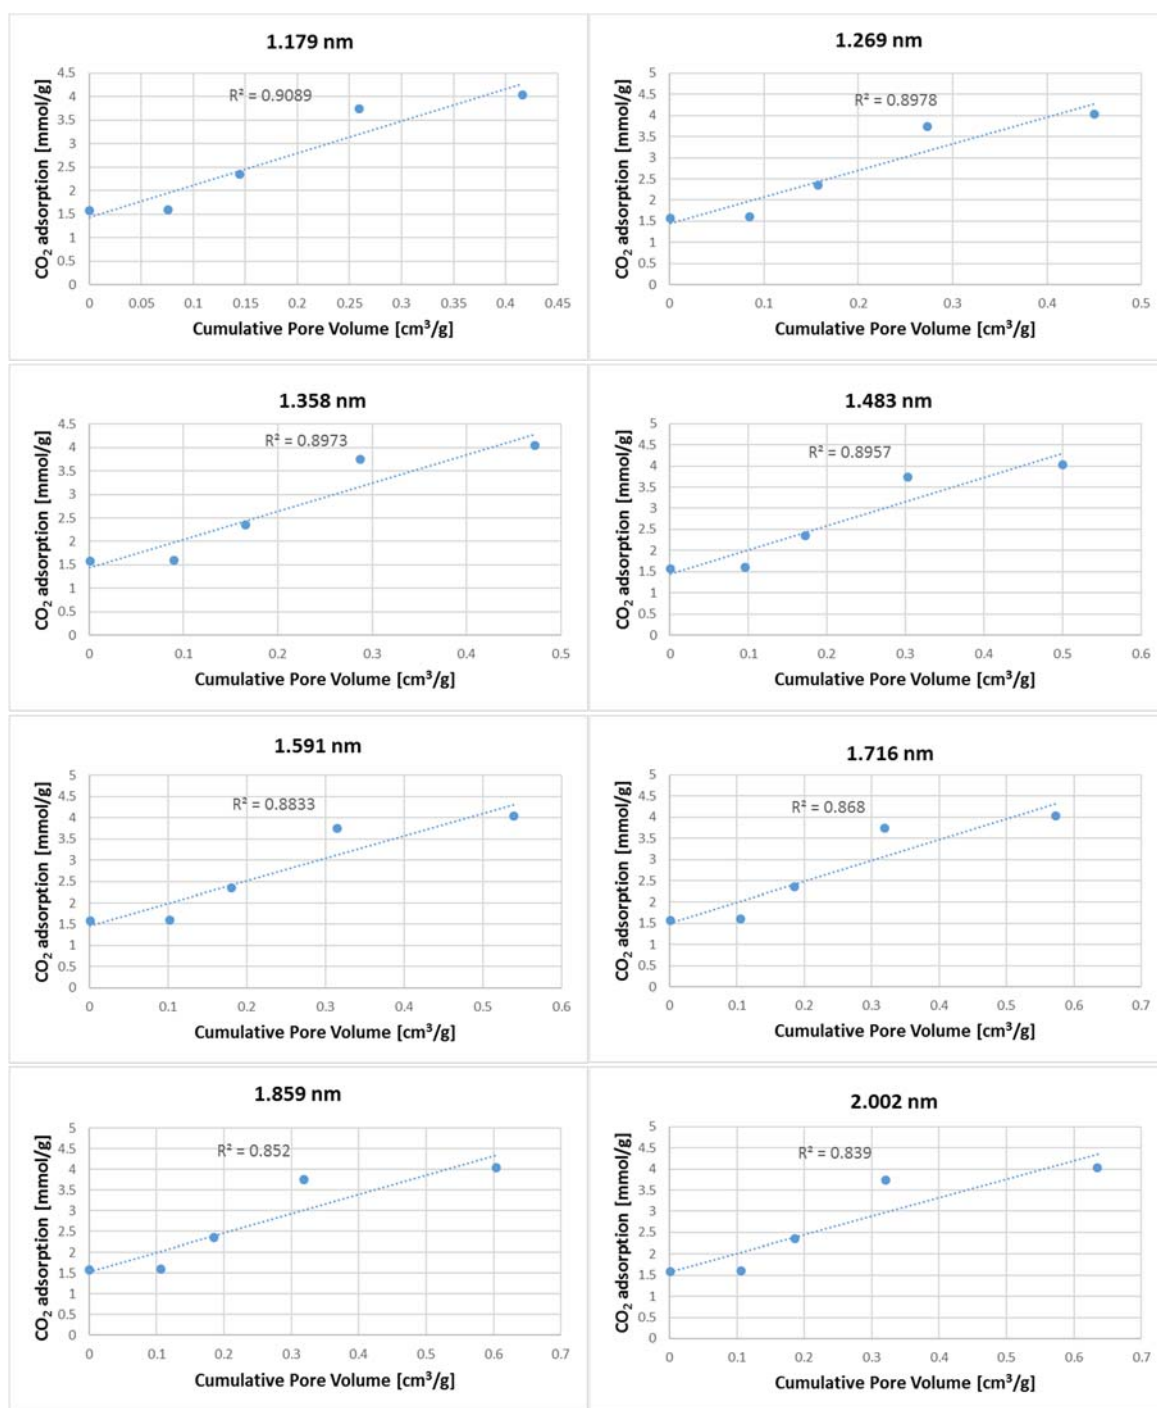

Figure S6. CO<sub>2</sub> adsorption at 1 bar and 10°C as a function of the volume of pores which are equal to and below given diameter. The best fit was outlined in red.

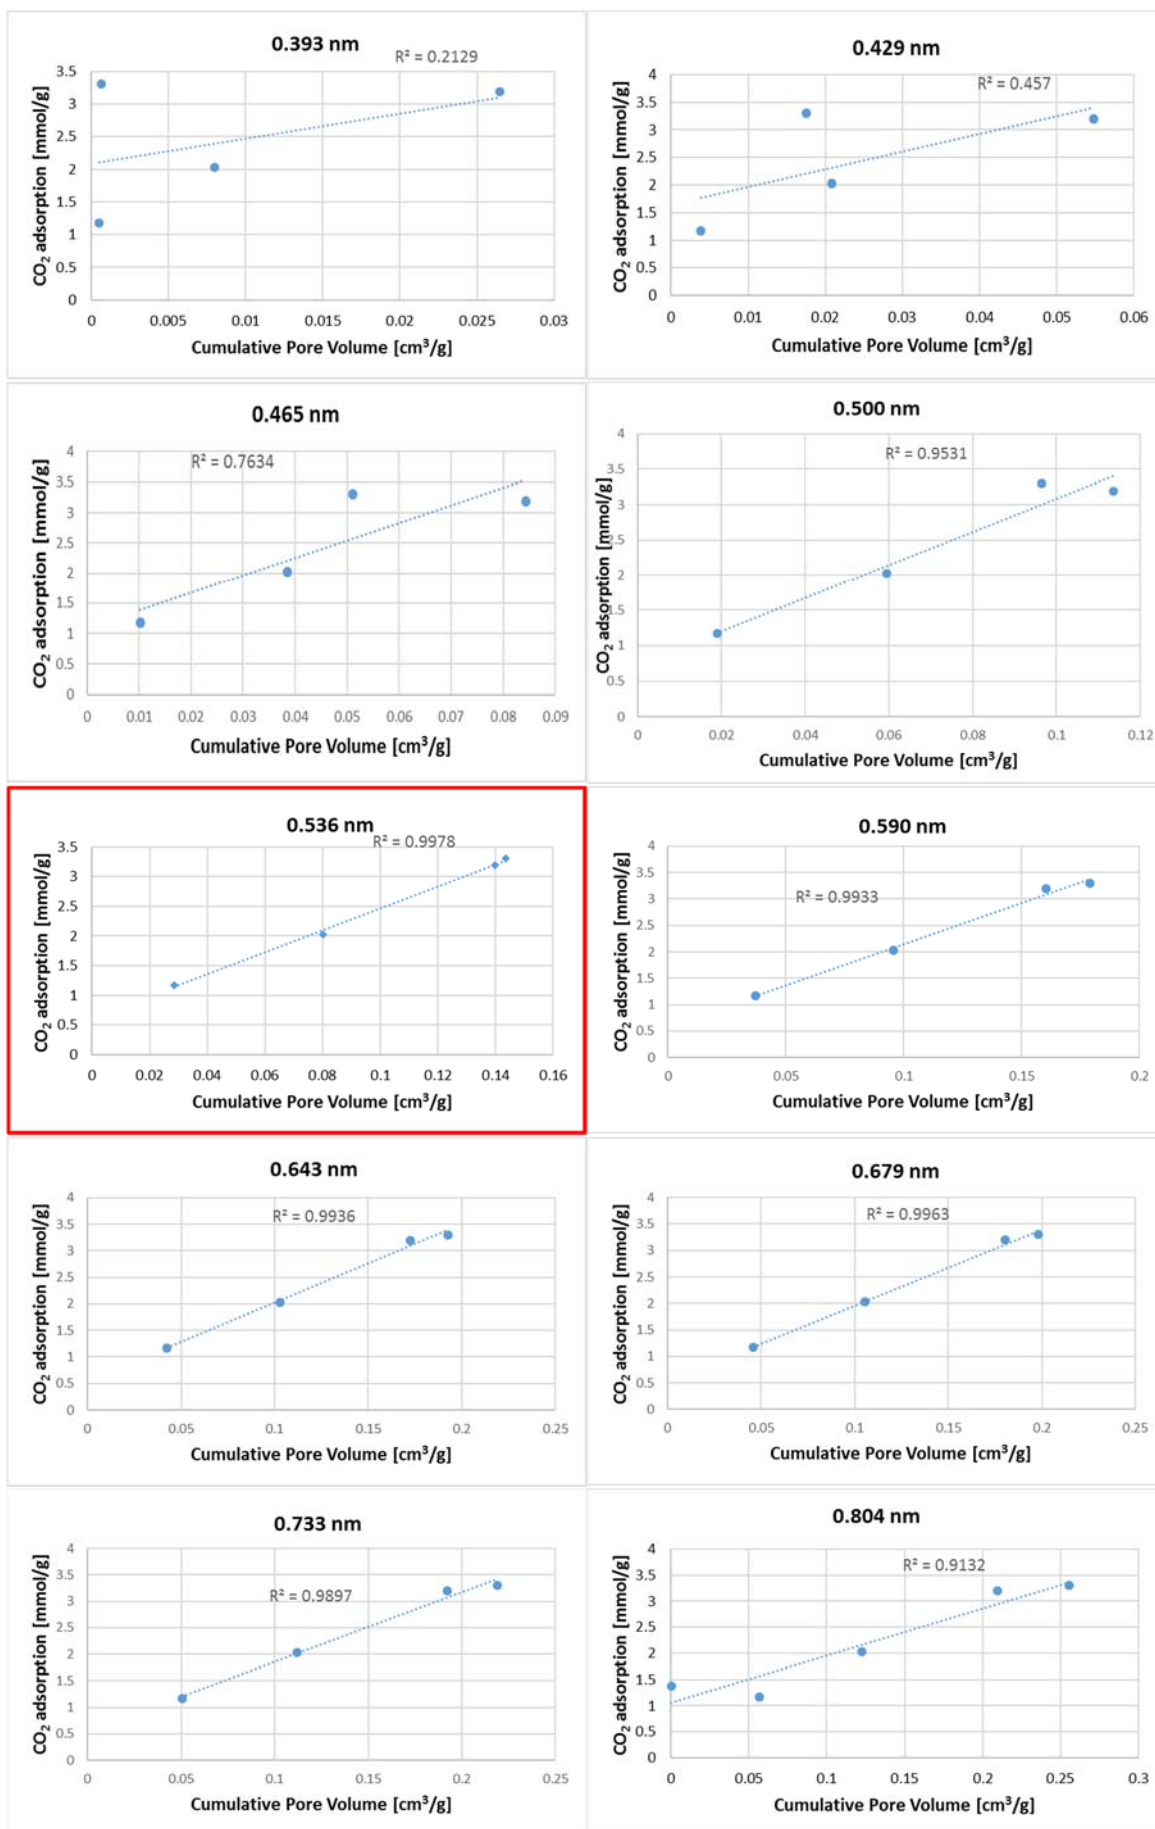

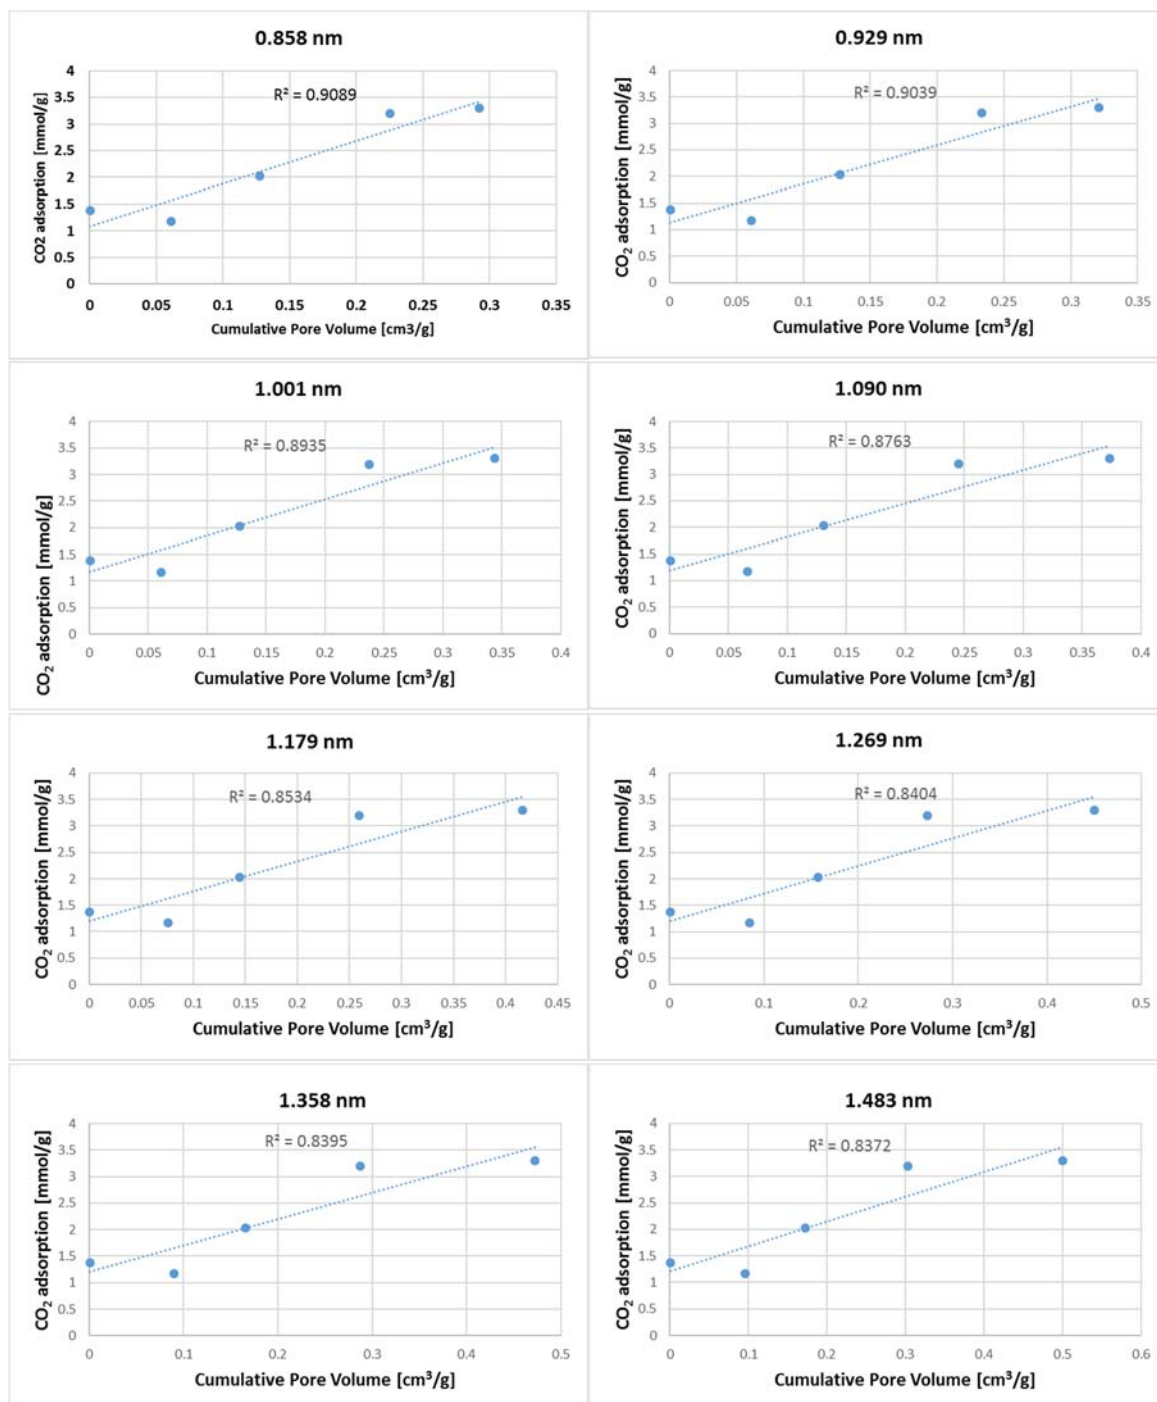

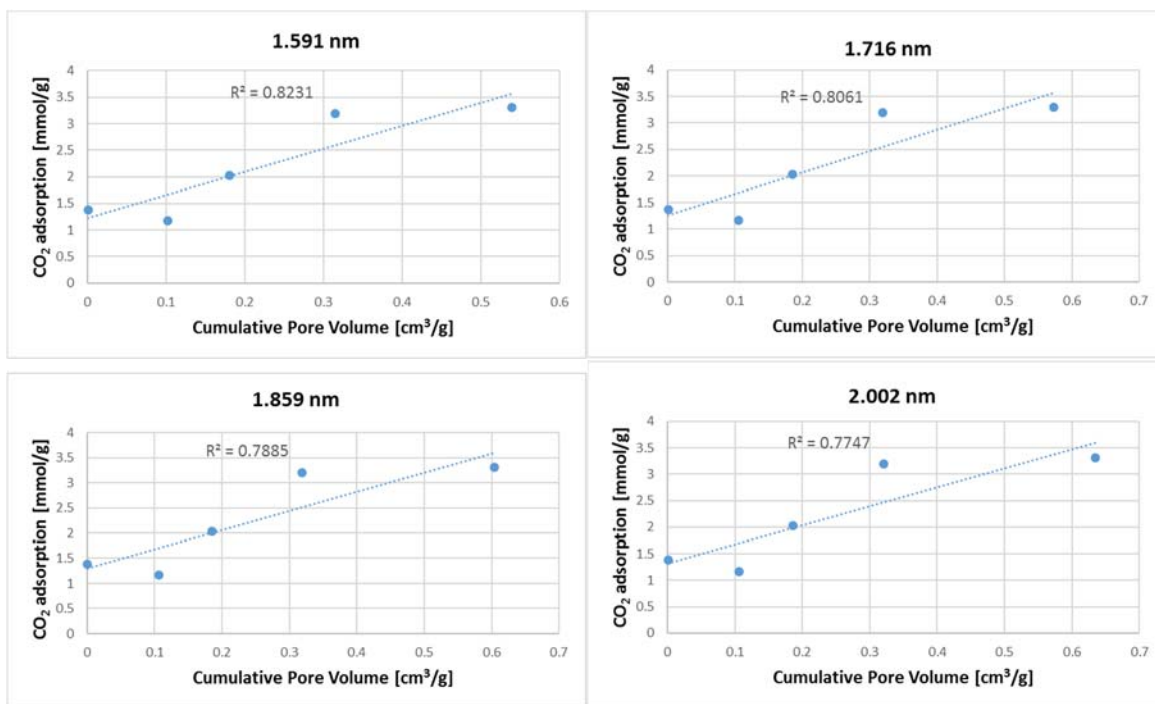

Figure S7. CO<sub>2</sub> adsorption at 1 bar and 20°C as a function of the volume of pores which are equal to and below given diameter. The best fit was outlined in red.

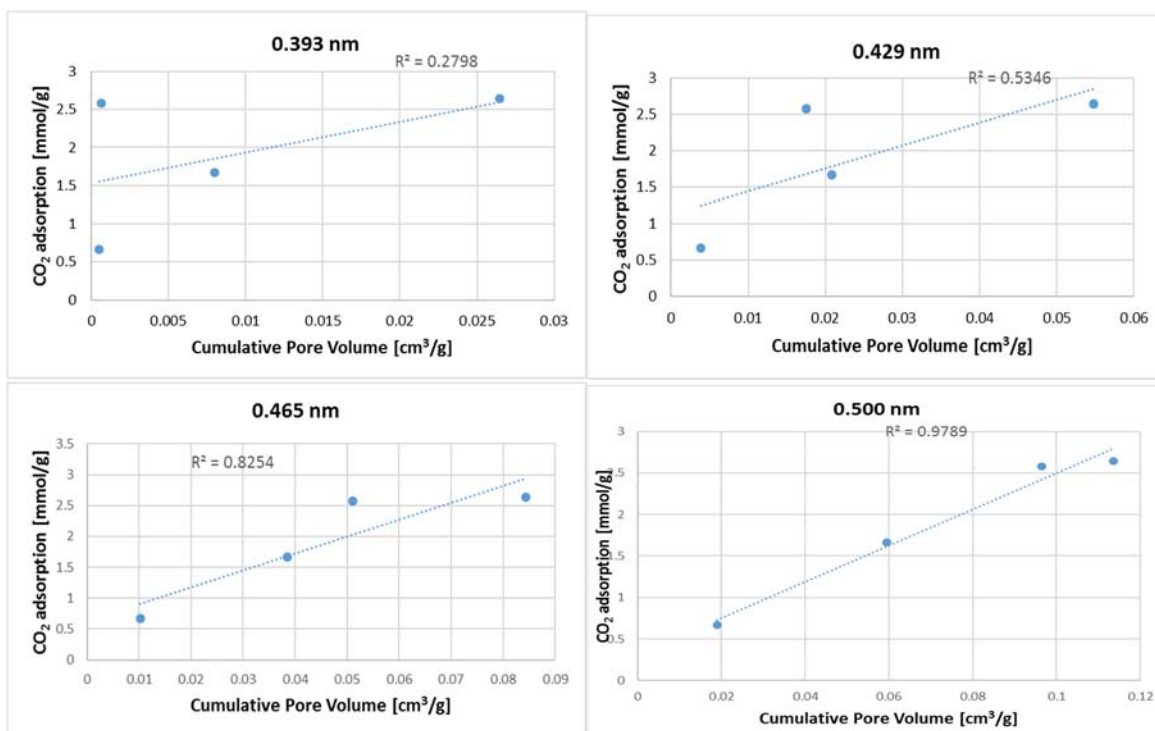

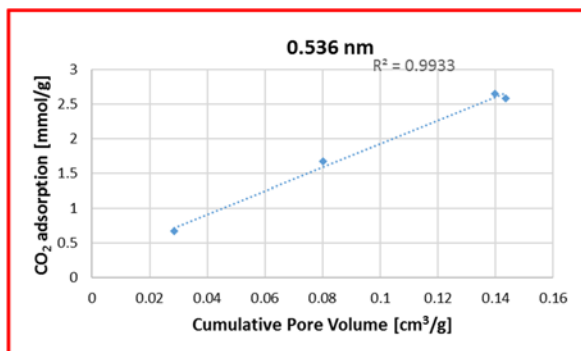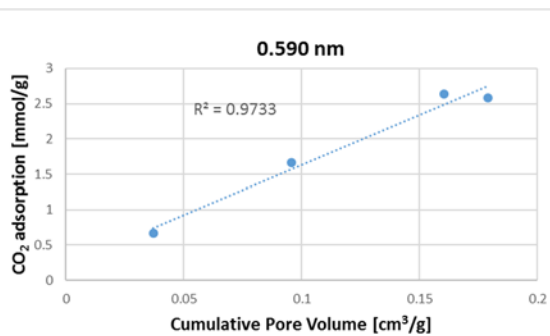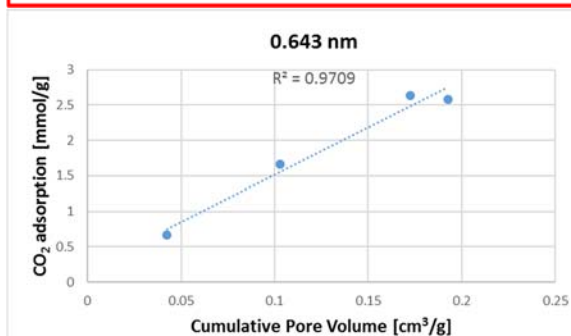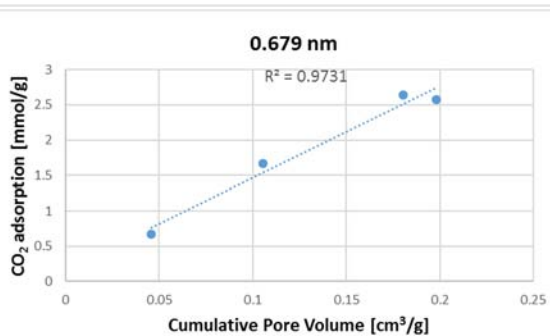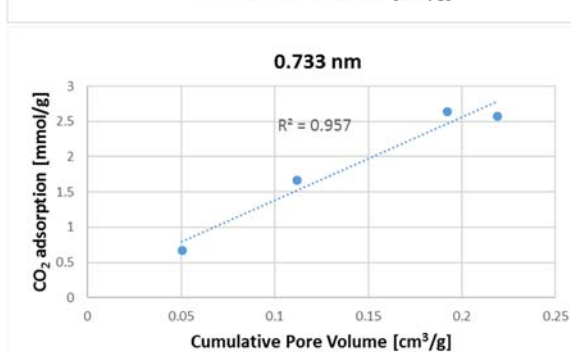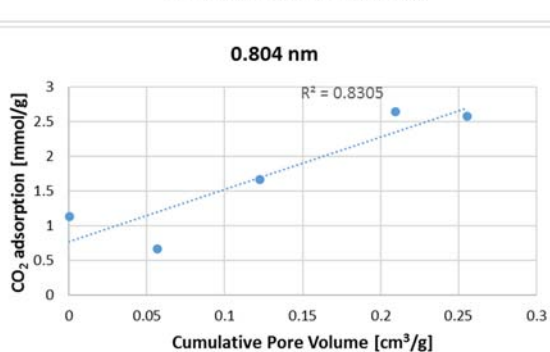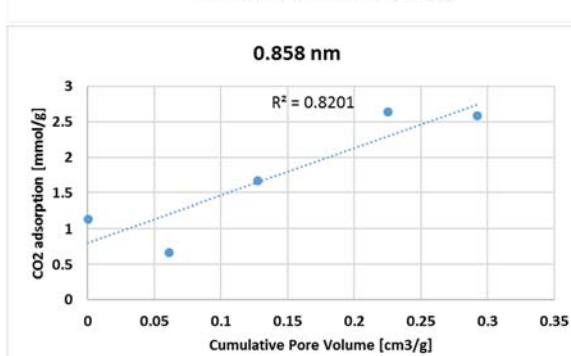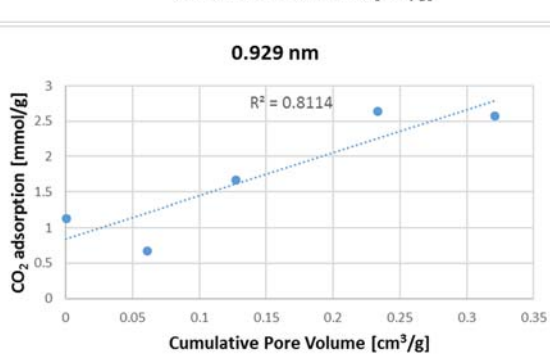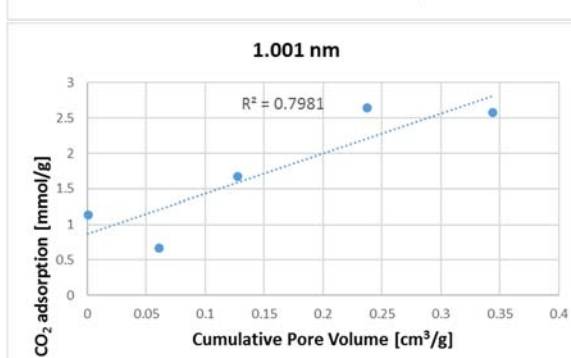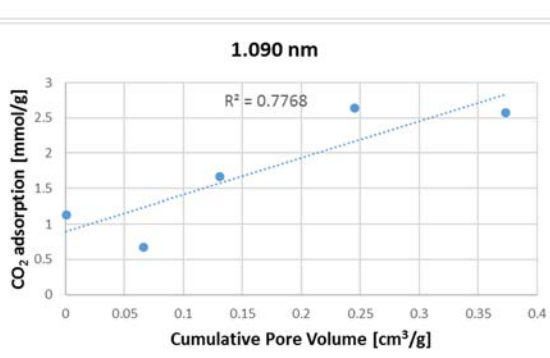

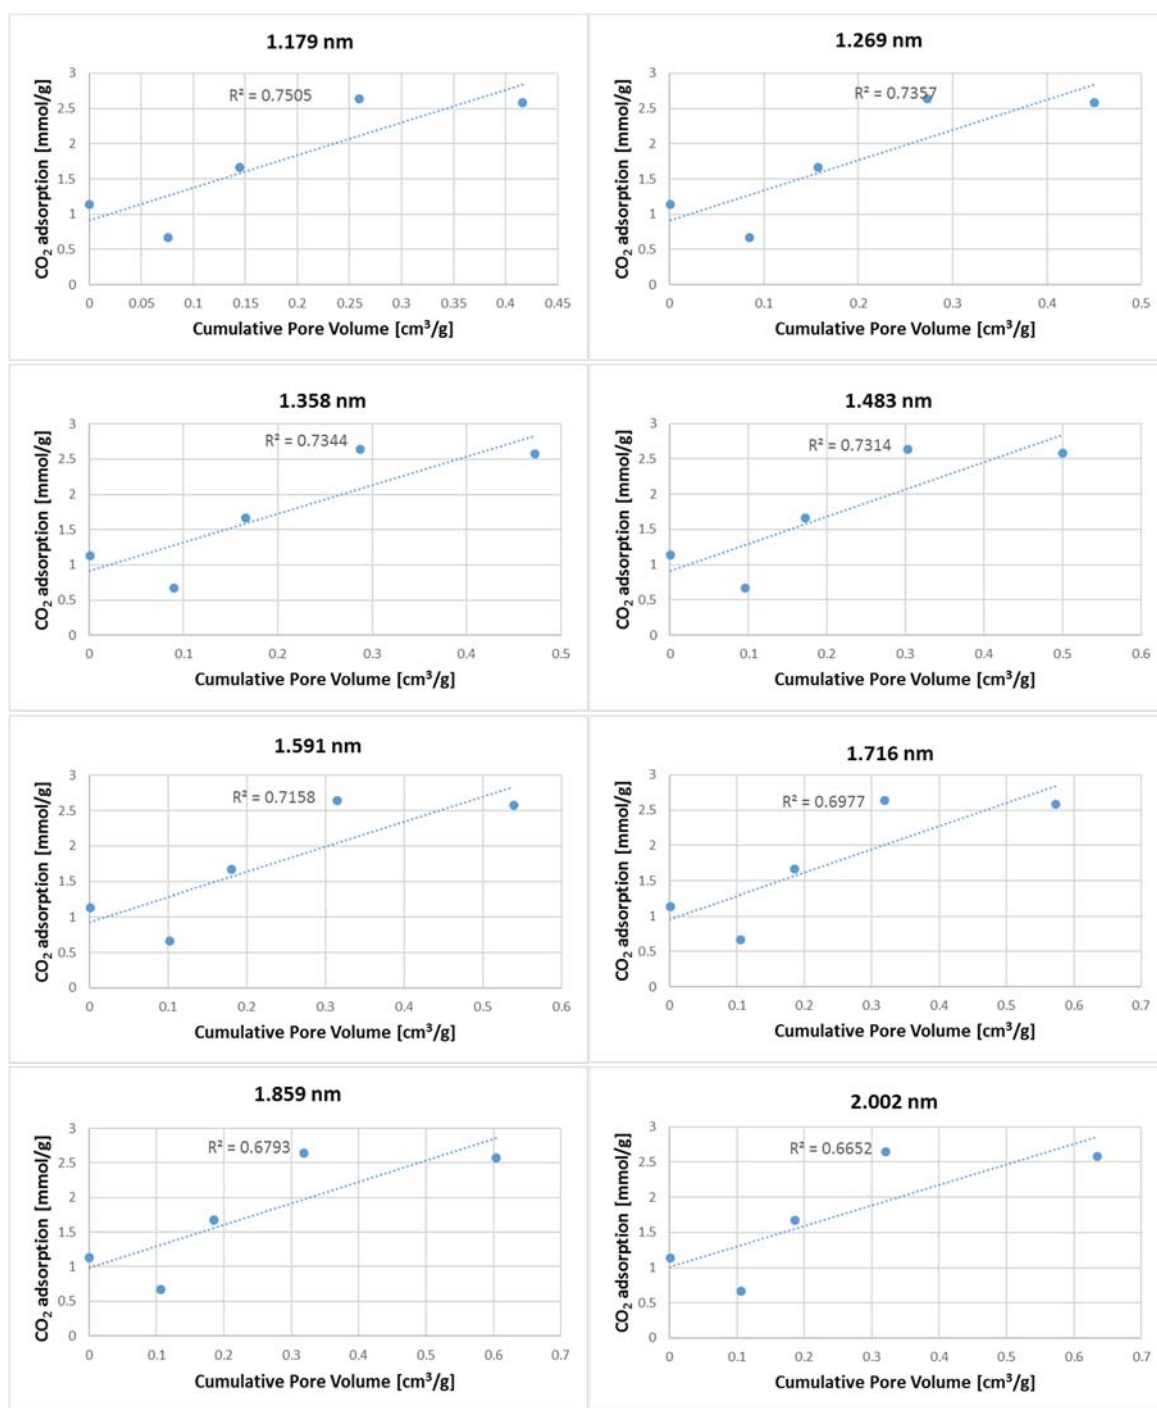

Figure S8. CO<sub>2</sub> adsorption at 1 bar and 30°C as a function of the volume of pores which are equal to and below given diameter. The best fit was outlined in red.

Table S1. CO<sub>2</sub> adsorption at different temperatures at the pressure of 1 bar

| Sample                           | CO <sub>2</sub> adsorption [mmol/g] |         |         |         |
|----------------------------------|-------------------------------------|---------|---------|---------|
|                                  | 0 [°C]                              | 10 [°C] | 20 [°C] | 30 [°C] |
| M-H <sub>2</sub> SO <sub>4</sub> | 4.44                                | 3.74    | 3.2     | 2.64    |

|         |      |      |      |      |
|---------|------|------|------|------|
| M-H3PO4 | 2.82 | 2.35 | 2.03 | 1.67 |
| M-HCl   | 1.77 | 1.58 | 1.38 | 1.13 |
| M-KOH   | 5.18 | 4.04 | 3.3  | 2.58 |
| M-NaOH  | 1.92 | 1.6  | 1.17 | 0.67 |

Table S2. Parameters of the Toth model for CO<sub>2</sub> adsorption at different temperatures

| M-KOH       |                 |                      | M-H2SO4 |                 |                      |       |
|-------------|-----------------|----------------------|---------|-----------------|----------------------|-------|
| Temperature | q <sub>mT</sub> | b                    | n       | q <sub>mT</sub> | b                    | n     |
| [°C]        | [mmol/g]        | [bar <sup>-1</sup> ] |         | [mmol/g]        | [bar <sup>-1</sup> ] |       |
| 0           | 30.10           | 0.452                | 0.522   | 23.80           | 3.708                | 0.305 |
| 10          | 28.12           | 0.346                | 0.526   | 21.13           | 2.513                | 0.324 |
| 20          | 27.12           | 0.257                | 0.532   | 19.13           | 1.679                | 0.341 |
| 30          | 24.57           | 0.202                | 0.540   | 17.75           | 1.265                | 0.343 |

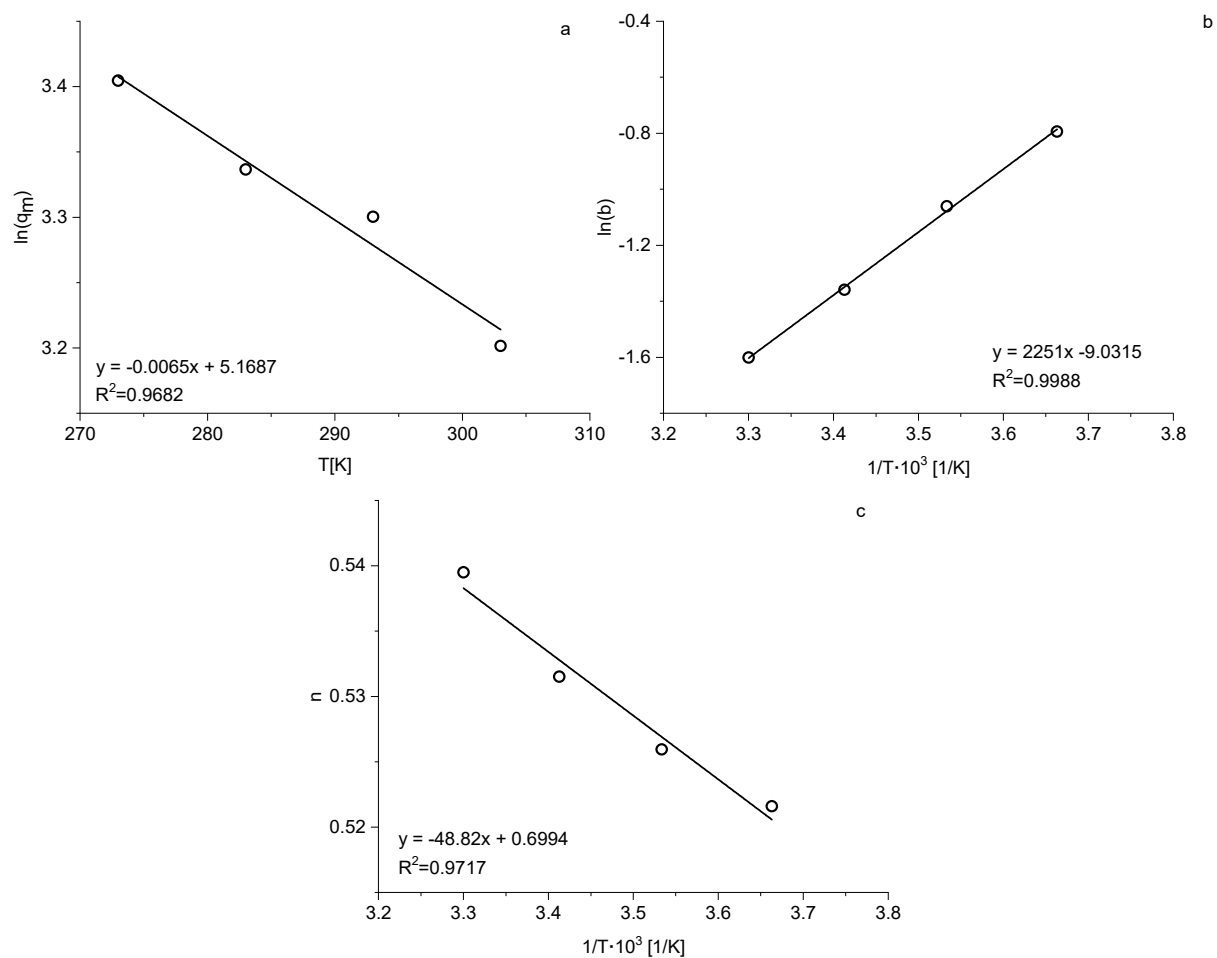

Figure S9. The plots: (a)  $\ln(q_m)$  versus  $T$ , (b)  $\ln(b)$  versus  $1/T$ , and (c)  $n$  versus  $1/T$  applied to the calculation of the Toth parameters in equations (1–4) for M-KOH

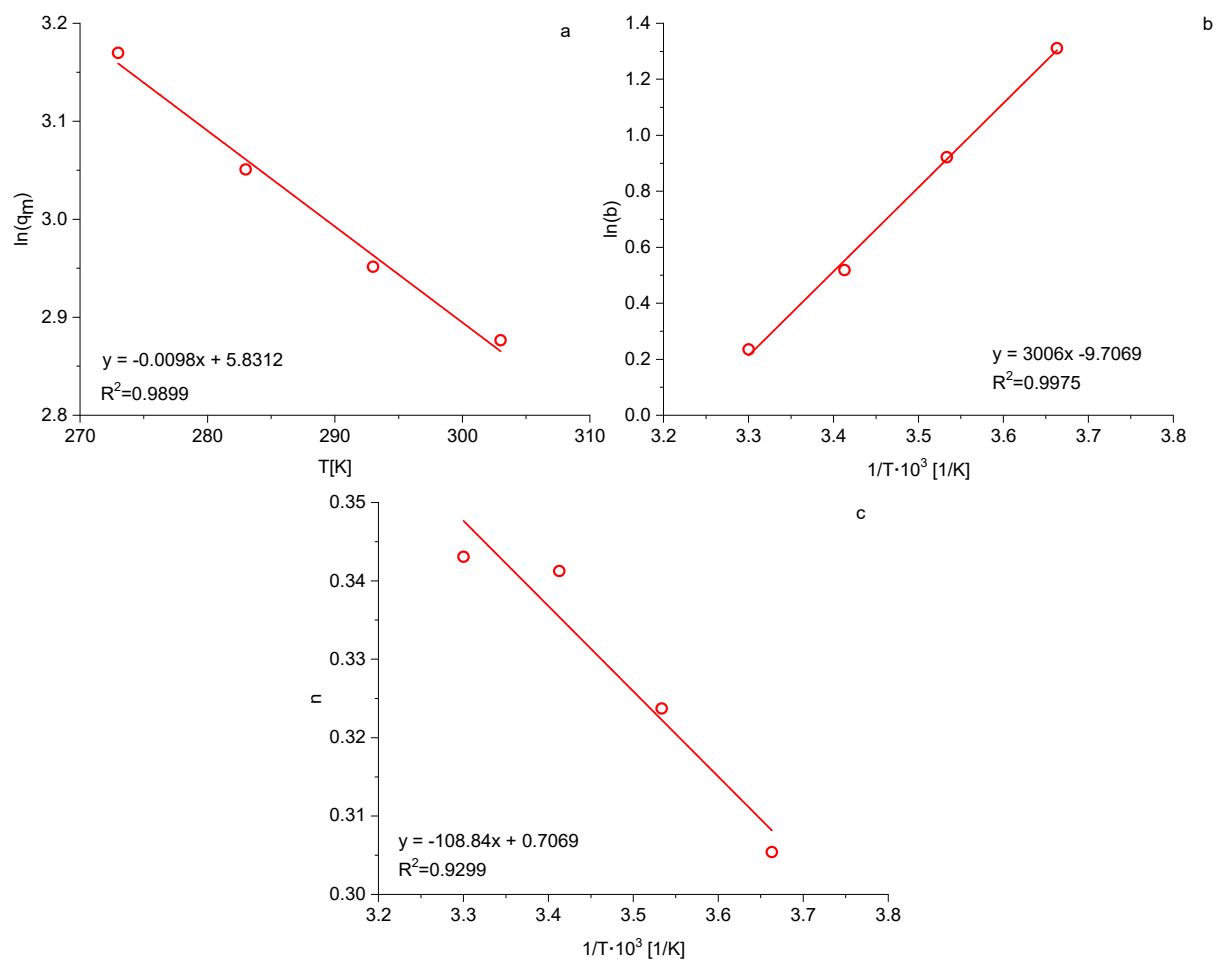

Figure S10. The plots: (a)  $\ln(q_m)$  versus  $T$ , (b)  $\ln(b)$  versus  $1/T$ , and (c)  $n$  versus  $1/T$  applied to the calculation of the Toth parameters in equations (1–4) for M-H<sub>2</sub>SO<sub>4</sub>

Table S3. The parameters of the Toth temperature depended on equations for M-KOH and M-H2SO4 activated carbons

| Parameter       | M-KOH | M-H2SO4 | Unit              |
|-----------------|-------|---------|-------------------|
| Q               | 18715 | 24992   | J/mol             |
| b <sub>0</sub>  | 0.228 | 1.463   | bar <sup>-1</sup> |
| n <sub>0</sub>  | 0.521 | 0.308   |                   |
| α               | 0.179 | 0.399   |                   |
| q <sub>m0</sub> | 30.19 | 23.55   | mmol/g            |
| χ               | 1.761 | 2.672   |                   |

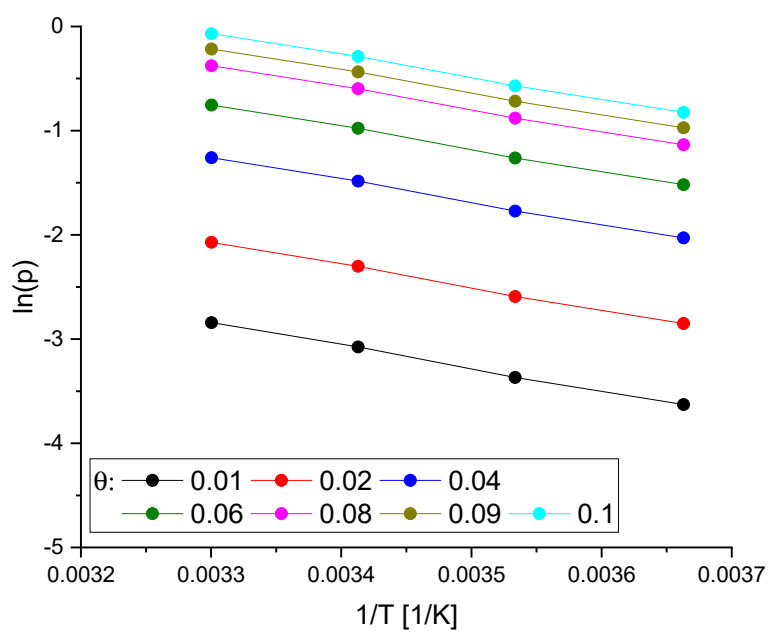

Figure S11. The plot of the function  $\ln(p)$  vs  $1/T$  for different surface coverage for M-KOH

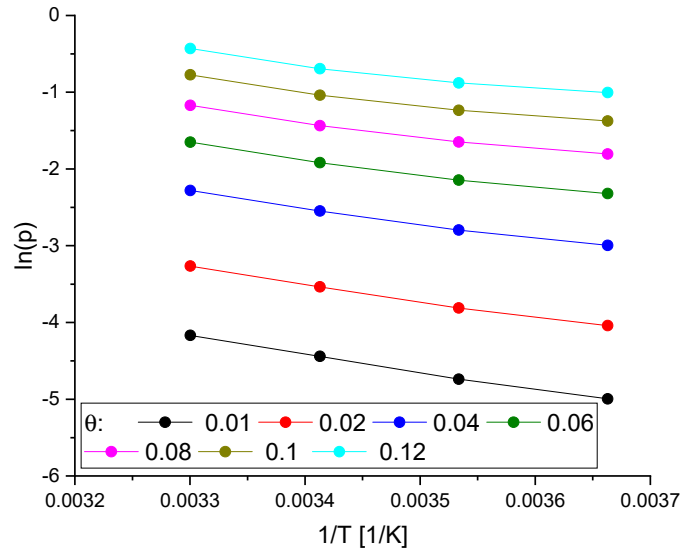

Figure S12. The plot of the function  $\ln(p)$  vs  $1/T$  different surface coverage for M-H<sub>2</sub>SO<sub>4</sub>

The isosteric heat of adsorption:

$$E_{iso} = -R \left( \frac{\partial \ln(p)}{\partial \left(\frac{1}{T}\right)} \right)_{\theta} \quad (S1)$$

Linear form of the equation (S1)

$$\ln(p)_{\theta} = -\frac{E_{iso}}{R} \frac{1}{T} + C \quad (S2)$$
